# Supplementary figures and images for: The landscape of infantile epileptic spasms syndrome in South Asia: peculiarities, challenges, and way forward
Source: PubMed Central journal article supplement — Lancet Reg Health Southeast Asia. 2023 Feb 28;12:100170. doi: 10.1016/j.lansea.2023.100170 (PMC10306027; doi:10.1016/j.lansea.2023.100170), 2023-02-28

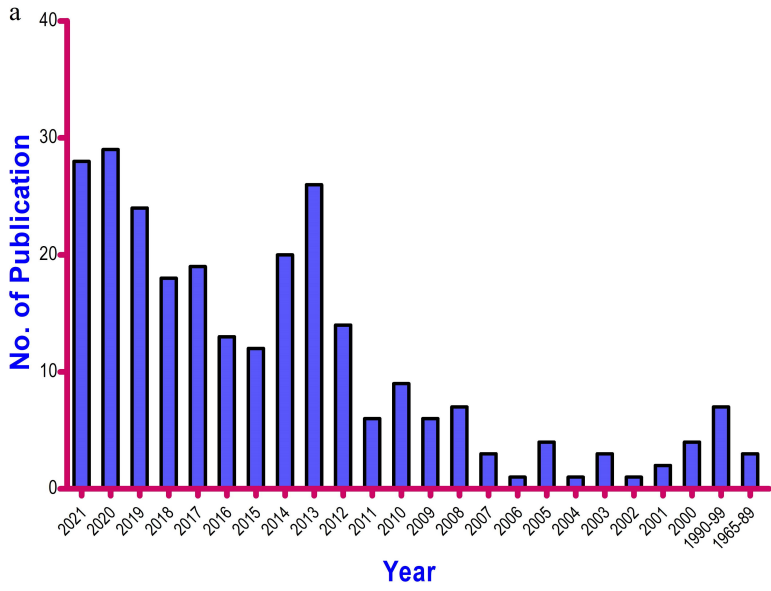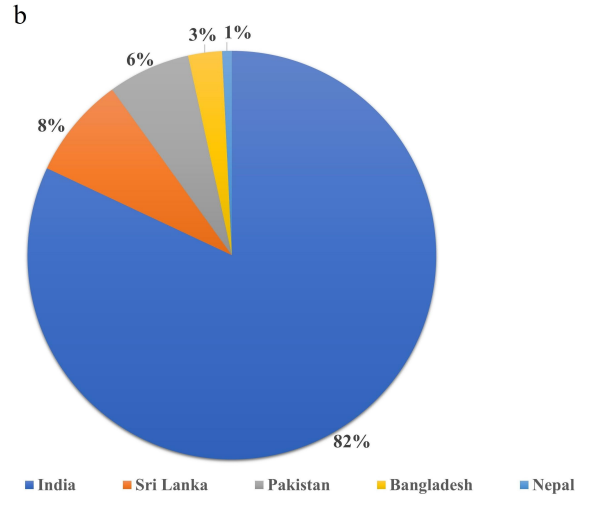

Supplement: mmc2.pdf [file mmc2.pdf]
